# Supplementary material for: A novel 2D net-like supramolecular polymer constructed from Ln6Cu24node and trans-Cu(Gly)2bridge
Source: Royal Society of Chemistry journal article supplement (doi:10.1039/b400447g), 2004-01-01
Supplement: b400447g.doc [file b400447g.doc]

# Supplementary data

#### Preparation and Structure Characterization:

**1**Er: The pH value of an aqueous solution (10 ml) of Er(ClO4)36H2O (0.574g, 1mmol) and glycine (0.150g, 2mmol) was adjusted to about 7.0 by slow addition of 0.1 M NaOH solution. After two hours of being heated and stirred at 60C, Cu(ClO4)26H2O (0.741g, 2mmol) was added. Then the pH value of the solution was again adjusted to about 6.6. After two hours of stirring, the solution was filtrated and placed in a desiccator filled with phosphorus pentaoxide. Blue crystals were obtained several weeks later. Yield: 0.31g, 23%. Element analysis (%) calcd for C40H210Cl24Cu27Er6N20Na2O216: C 5.97, H 2.63, N 3.48; found: C 5.74, H 2.49, N 3.79.

Crystal data of **1**Er: Na2[Er6Cu27(Gly)20(3-OH)30 (H2O)22(ClO4)] (ClO4)23 (H2O)28, *Mr* = 8044.20, triclinic, *P-1*, *a* = 17.3348(3), *b* = 18.0854(2), *c* = 20.76920(10) Å, ** = 106.9130(10), ** = 100.5850(10), **= 105.8490(10), *V*= 5742.67(12) Å3, *Z*= 1, ** = 2.326 g cm-3, 2*q*max = 50.12°, (-20  *h* 10, -21  *k*  21, -24  *l*  24), *T* = 293(2)K, 29441 measured reflections. *R*1= 0.0735 for 15070 reflections (*I*>2*s(I)*), *R*2 = 14.80 for 19927 independent reflections (all data) and 1527 parameters. *Gof* = 1.146. Several oxygen atoms from ClO4- were treated to be isotropic. Hydrogen atoms on carbon and nitrogen atoms were added geometrically and not refined, no attempt was made to locate the hydrogen atoms of water.

# Intensity data were collected on a Siemens Smart/CCD area-detector diffractometer with Mo-*K* radiation (**=0.71073Å). Data reductions and cell refinements were performed with Smart-CCD software [1]. The structures were solved by direct methods using SHELXS-97[2] and were refined by full-matrix least squares methods using SHELXL-97.

[1] XSCANS (Version 2.1), Siemens Analytical X-Ray Instruments Inc., Madison, WI, 1994.

[2] G. M. Sheldrick, *SHELXL-97, Program for X-ray Crystal Structure Refinement;* University of Göttingen: Göttingen, (Germany), 1997.

Structure Figures:

Figure S1. Coordination polyhedron of Er3+ ion.


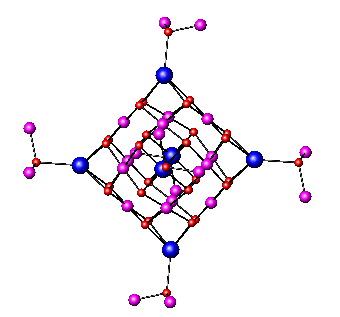

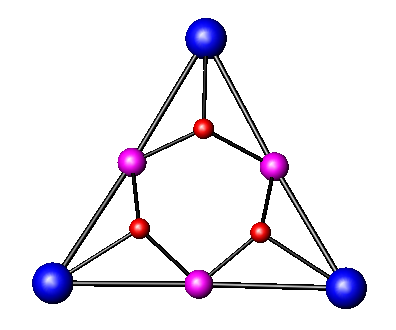


(a) (b)


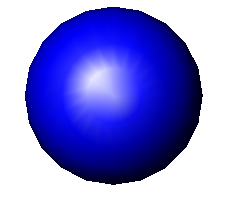
, Er;
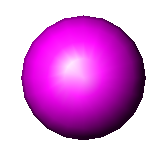
, Cu;
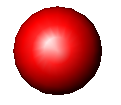
, O

Figure S2. (a) The metal-hydroxide framework of the Er6Cu24 node of **1**Er**;** (b) the structure of one of the faces of the octahedron.


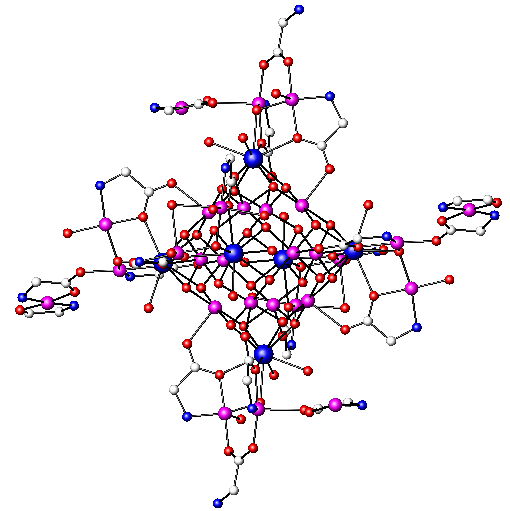


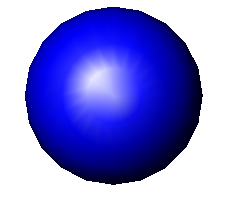
, Er;
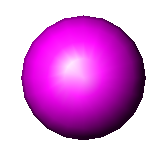
, Cu;
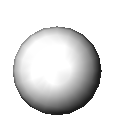
, C;
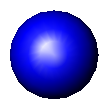
, N;
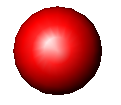
, O

Figure S3. The structure of the cation of **1**Er (the captured ClO4- ion is omitted for clarity).

Figure S4. The structure of one of vertices (Er1) of the octahedron of **1**Er. (ellipsoids at 25% probability).

Figure S5. The structure of one of vertices (Er2) of the octahedron of **1**Er. (ellipsoids at 25% probability).

Figure S6. The structure of one of vertices (Er3) of the octahedron of **1**Er. (ellipsoids at 25% probability).

**Physical Properties**

Figure S7. Temperature dependence of the electrical conductivity of **1**Er.

Figure S8. Temperature dependence of magnetic susceptibility of **1**Er. : 2-300K at 5000G : 2-300K at 2000G.
